# Supplementary material for: A self-consistent, multi-variate method for the determination of gas phase rate coefficients, applied to reactions of atmospheric VOCs and the hydroxyl radical
Source: Copernicus journal article supplement (doi:10.5194/acp-2017-917), 2017-10-06
Supplement: Supplementary file 1 [file acp-2017-917-supplement.pdf]

## Supplementary Information

Table S1 Estimated range in total VOC concentration and total OH reactivity of each mixture injected into the reactor.

| Mixture no. | total [VOC] / ppb | total OH reactivity / s <sup>-1</sup> |
|-------------|-------------------|---------------------------------------|
| 1           | 22-110            | 50-250                                |
| 2           | 22-110            | 20-100                                |
| 3           | 25-100            | 30-130                                |

Table S2 O<sub>3</sub> + VOC literature data for compounds in the ambient air analysis.

| compound                | literature <sup>a</sup> $k_{O_3} / 10^{-17}$<br>$\text{cm}^3 \text{ molecule}^{-1} \text{ s}^{-1}$<br>298 K |
|-------------------------|-------------------------------------------------------------------------------------------------------------|
| tridecane               | $< 1 \times 10^{-6}$                                                                                        |
| isoprene                | 1.27                                                                                                        |
| styrene                 | 1.70                                                                                                        |
| 3-ethyltoluene          | $< 1 \times 10^{-3}$                                                                                        |
| dodecane                | $< 1 \times 10^{-6}$                                                                                        |
| 1,2,3-trimethylbenzene  | $< 1 \times 10^{-3}$                                                                                        |
| 1,2,4-trimethylbenzene  | $< 1 \times 10^{-3}$                                                                                        |
| naphthalene             | 0.02                                                                                                        |
| 2-ethyltoluene          | $< 1 \times 10^{-3}$                                                                                        |
| <i>n</i> -decane        | $< 1 \times 10^{-6}$                                                                                        |
| ethylbenzene            | $< 1 \times 10^{-3}$                                                                                        |
| <i>n</i> -heptane       | $< 1 \times 10^{-6}$                                                                                        |
| <i>n</i> -propylbenzene | $< 1 \times 10^{-3}$                                                                                        |
| toluene                 | $< 1 \times 10^{-3}$                                                                                        |
| benzene                 | $< 1 \times 10^{-3}$                                                                                        |
| isopropylbenzene        | $< 1 \times 10^{-3}$                                                                                        |
| <i>n</i> -hexane        | $< 1 \times 10^{-6}$                                                                                        |
| ethyl acetate           |                                                                                                             |
| dichloromethane         |                                                                                                             |

<sup>a</sup> Atkinson and Arey, 2003

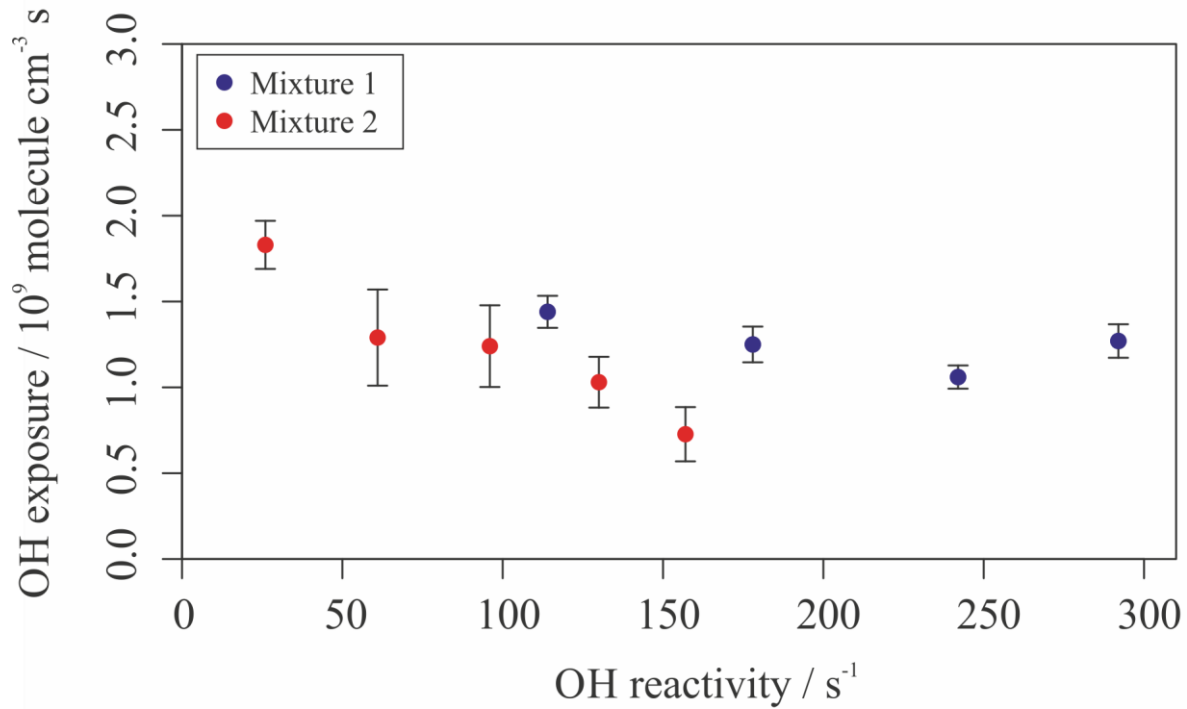

**Figure S1** Plot of OH exposure against estimated OH reactivity for the synthetic gas mixtures 1 and 2 showing the trend in OH exposure with increasing OH reactivity.
